# Supplementary material for: A Nucleus-Targeting WT1 Antagonistic Peptide Encapsulated in Polymeric Nanomicelles Combats Refractory Chronic Myeloid Leukemia
Source: MDPI journal article supplement (doi:10.3390/pharmaceutics15092305), 2023-09-12
Supplement: s1 [file s1]

# A nucleus-targeting WT1 antagonistic peptide encapsulated by polymeric nanomicelles combat refractory chronic myeloid leukemia

Mengting Chen <sup>1,2,#</sup>, Xiaocui Fang <sup>1,2, #</sup>, Rong Du <sup>1,2</sup>, Jie Meng <sup>1,2</sup>, Jingyi Liu <sup>1,2</sup>, Mingpeng Liu <sup>1,2,3</sup>, Yanlian Yang <sup>1,2,\*</sup> and Chen Wang <sup>1,2,\*</sup>

## Supplementary Information

**Table S1.** Abbreviations involved in the article.

| Abbreviation | Name                                                                                       |
|--------------|--------------------------------------------------------------------------------------------|
| Abl          | the Abelsonmurine leukemia                                                                 |
| AP           | accelerated phase                                                                          |
| Bcr          | the breakpoint cluster region                                                              |
| BP           | blast phase                                                                                |
| CMC          | critical micelle concentration                                                             |
| CML          | chronic myeloid leukemia                                                                   |
| CP           | chronic phase                                                                              |
| CPPs         | cell-penetrating peptides                                                                  |
| DEGs         | differentially expressed genes                                                             |
| EPR          | enhanced permeation and retention                                                          |
| IVIS         | <i>in vivo</i> imaging system                                                              |
| KEGG         | Kyoto Encyclopedia of Genes and Genomes                                                    |
| PBS          | phosphate buffered saline                                                                  |
| PEG-PE       | Distearoyl- <i>sn</i> -glycero-3-phosphoethanolamine-n-[methoxy (polyethylene glycol)-2000 |
| TAT          | HIV-1 trans-activator of transcription                                                     |
| WT1          | Wilms' tumor 1                                                                             |

**Table S2.** Amino acid sequences of *de novo*-designed peptides

| Peptide name | Amino acid sequence                                    |
|--------------|--------------------------------------------------------|
| WIP1         | NH <sub>2</sub> -DQRPSWGRRPDRRYGRKKRRQRRR-COOH         |
| WIP2         | NH <sub>2</sub> -DQRRSWGRRRPDRRYGRKKRRQRRR-COOH        |
| WIP3         | NH <sub>2</sub> -DQRPSWGRRPDRRGPKKKRKV-COOH            |
| WIP4         | NH <sub>2</sub> -RRQSNSTGYRRRNDYGRKKRRQRRR-COOH        |
| WIP5         | NH <sub>2</sub> -RRDPYQCRFDRRRDDFSDSRRYGRKKRRQRRR-COOH |
| WIP21        | NH <sub>2</sub> -DQKKS WGKKKPDKKYGRKKRRQRRR-COOH       |
| WIP22        | NH <sub>2</sub> -DQHHSWGHHPDHHYGRKKRRQRRR-COOH         |
| WIP23        | NH <sub>2</sub> -DQKKGGGKKKPDKKYGRKKRRQRRR-COOH        |
| WIP2V        | NH <sub>2</sub> -VVGGDQRRSWGRRRPDRRYGRKKRRQRRR-COOH    |
| WIP2F        | NH <sub>2</sub> -FFGGDQRRSWGRRRPDRRYGRKKRRQRRR-COOH    |
| WIP2W        | NH <sub>2</sub> -WWGGDQRRSWGRRRPDRRYGRKKRRQRRR-COOH    |

WIP2W

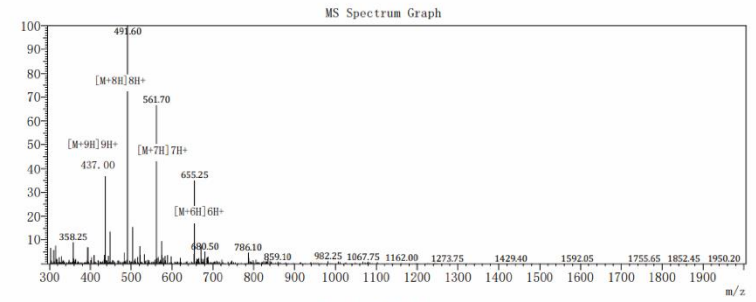

Sample Information

|                    |                                                           |                     |             |             |                                              |
|--------------------|-----------------------------------------------------------|---------------------|-------------|-------------|----------------------------------------------|
| Dissolution method | : 5% <i>HAC</i> +8% <i>ACN</i> +87% <i>H<sub>2</sub>O</i> | Interface           | : ESI       | Prerod Bias | : +1.5kv                                     |
| Modified Date      | : 2022/09/20                                              | Nebulizing Gas Flow | : 1.50L/min | Detector    | : -0.2kv                                     |
| Injection Volume   | : 1ul                                                     | CDL Temp            | : 250C      | T. Flow     | : 0.2ml/min                                  |
| Heat Block Temp    | : 200                                                     | CDL Volt            | : 0v        | B. conc     | : 50% <i>H<sub>2</sub>O</i> /50% <i>MEOH</i> |
| Order ID           | : GP020281-1                                              |                     |             |             |                                              |
| Name               | : WT1-2W                                                  |                     |             |             |                                              |
| Sequence           | : WWGGDQRRSWGRRRPDRYGRKKRRQRRR                            |                     |             |             |                                              |
| Lot.No             | : GP020281-1-0919                                         |                     |             |             |                                              |
| Theoretical        | : 3925.41                                                 |                     |             |             |                                              |
| Observed           | : 3924.80                                                 |                     |             |             |                                              |

FITC-WIP2W

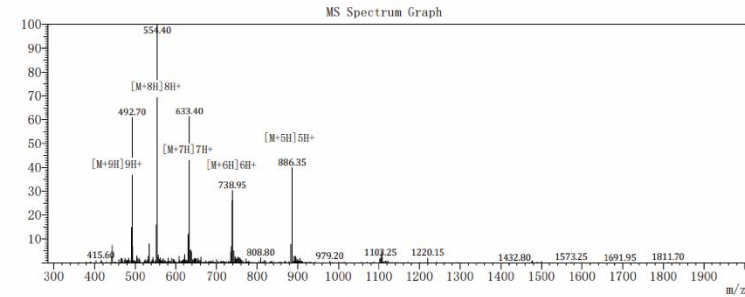

Sample Information

|                    |                                                           |                     |             |             |                                              |
|--------------------|-----------------------------------------------------------|---------------------|-------------|-------------|----------------------------------------------|
| Dissolution method | : 5% <i>HAC</i> +8% <i>ACN</i> +87% <i>H<sub>2</sub>O</i> | Interface           | : ESI       | Prerod Bias | : +1.5kv                                     |
| Modified Date      | : 2022/04/19                                              | Nebulizing Gas Flow | : 1.50L/min | Detector    | : -0.2kv                                     |
| Injection Volume   | : 1ul                                                     | CDL Temp            | : 250C      | T. Flow     | : 0.2ml/min                                  |
| Heat Block Temp    | : 200                                                     | CDL Volt            | : 0v        | B. conc     | : 50% <i>H<sub>2</sub>O</i> /50% <i>MEOH</i> |
| Order ID           | : GP020271-3                                              |                     |             |             |                                              |
| Name               | : FITC-WT1-2W                                             |                     |             |             |                                              |
| Sequence           | : FITC-acp-WWGGDQRRSWGRRRPDRYGRKKRRQRRR                   |                     |             |             |                                              |
| Lot.No             | : GP020271-3-0323                                         |                     |             |             |                                              |
| Theoretical        | : 4427.95                                                 |                     |             |             |                                              |
| Observed           | : 4427.20                                                 |                     |             |             |                                              |

biotin-WIP2W

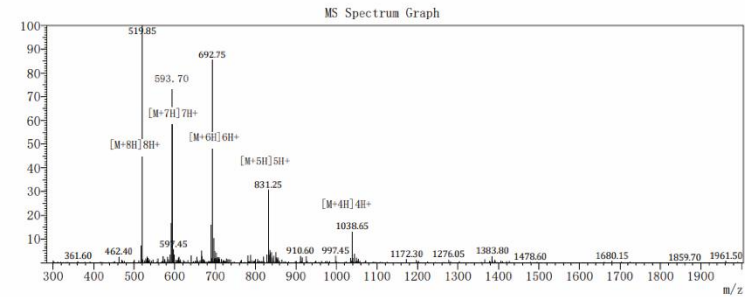

Sample Information

|                    |                                                           |                     |             |             |                                              |
|--------------------|-----------------------------------------------------------|---------------------|-------------|-------------|----------------------------------------------|
| Dissolution method | : 5% <i>HAC</i> +8% <i>ACN</i> +87% <i>H<sub>2</sub>O</i> | Interface           | : ESI       | Prerod Bias | : +1.5kv                                     |
| Modified Date      | : 2022/04/19                                              | Nebulizing Gas Flow | : 1.50L/min | Detector    | : -0.2kv                                     |
| Injection Volume   | : 1ul                                                     | CDL Temp            | : 250C      | T. Flow     | : 0.2ml/min                                  |
| Heat Block Temp    | : 200                                                     | CDL Volt            | : 0v        | B. conc     | : 50% <i>H<sub>2</sub>O</i> /50% <i>MEOH</i> |
| Order ID           | : GP020271-4                                              |                     |             |             |                                              |
| Name               | : Biotin-WT1-2W                                           |                     |             |             |                                              |
| Sequence           | : Biotin-WWGGDQRRSWGRRRPDRYGRKKRRQRRR                     |                     |             |             |                                              |
| Lot.No             | : GP020271-4-0323                                         |                     |             |             |                                              |
| Theoretical        | : 4151.71                                                 |                     |             |             |                                              |
| Observed           | : 4150.80                                                 |                     |             |             |                                              |

**Figure S1.** MS Spectrum results of WIP2W, FITC-WIP2W and biotin-WIP2W.

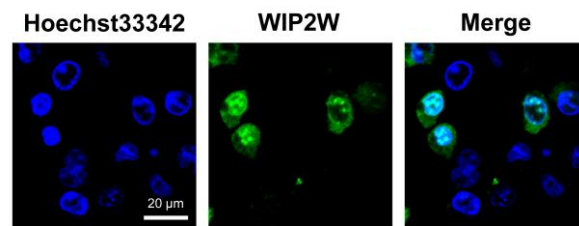

**Figure S2.** Intracellular localization of WIP2W peptide (10  $\mu\text{M}$ ) in K562 cells. Fluorescence images of K562 cells was obtained after incubation with FITC-WIP2W at 37  $^{\circ}\text{C}$  for 3.5 h. The blue fluorescence signifies the nucleus. The green fluorescence represents the FITC-labeled peptide (FITC-WIP2W), and the right figure displays the co-localization (scale bars: 20  $\mu\text{m}$ ).

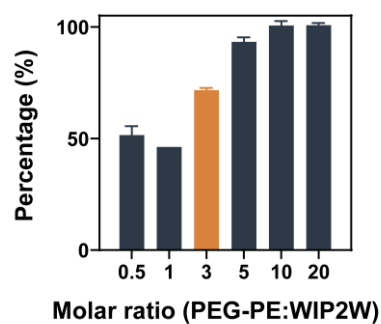

**Figure S3.** Encapsulation efficiency (%) of WIP2W (10  $\mu\text{M}$ ) in PEG-PE micelle at different molar ratios ranging from 0.5: 1 to 20: 1 (PEG-PE: WIP2W) in PBS. Data are presented as mean  $\pm$  SD ( $n = 3$ ).

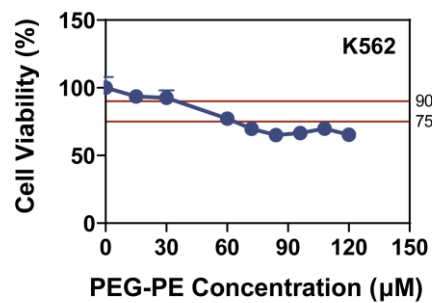

**Figure S4.** Viability of K562 cells after treatment with PEG-PE (15, 30, 60, 72, 84, 96, 108, and 120  $\mu\text{M}$ ) at 37  $^{\circ}\text{C}$  for 24 h was determined using a CCK-8 kit. Data are presented as mean  $\pm$  SD ( $n = 6$ ).

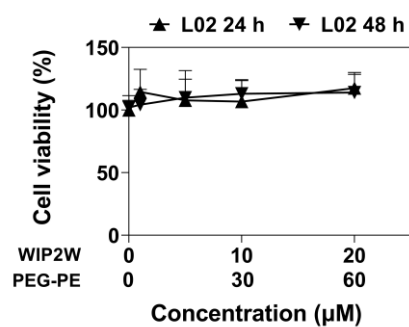

**Figure S5.** Cytotoxicity of M—WIP2W on L02 cells was evaluated using a CCK-8 kit. L02 cells were treated with M—WIP2W at the indicated concentrations for 24 and 48 h, respectively. Data are presented as mean  $\pm$  SD ( $n = 6$ ).

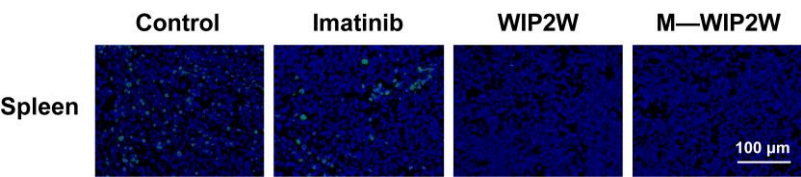

**Figure S6.** Representative Ki67 staining photomicrographs of the spleen tissues (scale bar: 100  $\mu$ m).
